# Supplementary material for: Identification of coke species on Fe/USY catalysts used for recycling polyethylene into fuels
Source: Royal Society of Chemistry journal article supplement (doi:10.1039/d4ra03608e), 2024-01-01
Supplement: d4ra03608e1.pdf [file d4ra03608e1.pdf]

Supplementary Information For

## Identification of coke species on Fe/USY catalysts used for recycling polyethylene into fuels

Yongli Wang,<sup>a</sup> Na Yan<sup>a</sup> and Zezhou Chen<sup>\*a</sup>

a. Department of Engineering, Huzhou University, 759 Erhuan North Road, Huzhou, 313000 (China) E-mail: chenzezhou@zjhu.edu.cn.

**Table S1.** The surface area and porosity of the USY zeolites with varied Si/Al ratios

| Catalysts | $S_{\text{BET}}$<br>( $\text{m}^2/\text{g}$ ) | $S_{\text{Micro}}$<br>( $\text{m}^2/\text{g}$ ) | $S_{\text{Meso}}$<br>( $\text{m}^2/\text{g}$ ) | $V_{\text{total}}$<br>( $\text{cm}^3/\text{g}$ ) | $V_{\text{micro}}$<br>( $\text{cm}^3/\text{g}$ ) | $V_{\text{meso}}$<br>( $\text{cm}^3/\text{g}$ ) |
|-----------|-----------------------------------------------|-------------------------------------------------|------------------------------------------------|--------------------------------------------------|--------------------------------------------------|-------------------------------------------------|
| USY(20)   | 648.3                                         | 539.5                                           | 108.8                                          | 0.48                                             | 0.278                                            | 0.202                                           |
| USY(60)   | 653.7                                         | 531.2                                           | 122.5                                          | 0.491                                            | 0.275                                            | 0.216                                           |
| USY(80)   | 660.3                                         | 528.3                                           | 132                                            | 0.487                                            | 0.272                                            | 0.215                                           |
| USY(120)  | 688.9                                         | 548.3                                           | 140.6                                          | 0.511                                            | 0.288                                            | 0.223                                           |

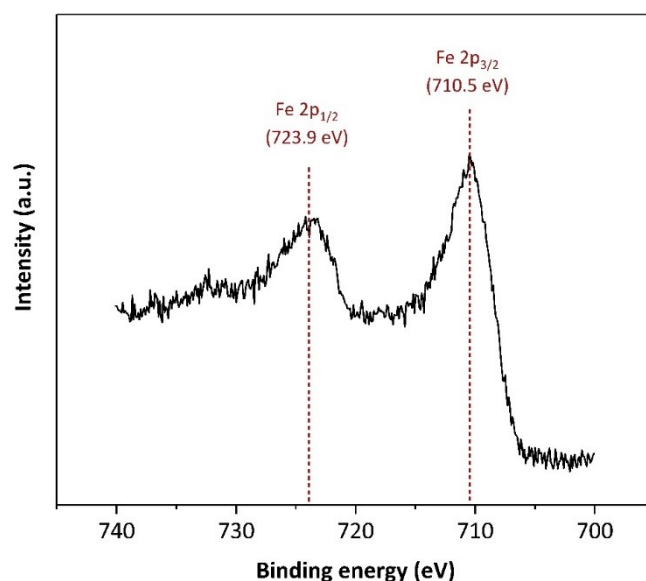

**Fig. S1.** The XPS spectrum of Fe 2p on the 10%Fe/USY catalyst.

The XPS spectrum of the Fe/USY catalyst shows two distinct Fe 2p peaks at 710.5 and 723.9 eV, which can be typically attributed to the Fe 2p<sub>3/2</sub> and Fe 2p<sub>1/2</sub> peak of the Fe<sub>2</sub>O<sub>3</sub>, respectively [S1], confirming that the iron species loaded on USY is Fe<sub>2</sub>O<sub>3</sub>.

[S1] Tan BJ, Klabunde KJ, Sherwood PM. X-ray photoelectron spectroscopy studies of solvated metal atom dispersed catalysts. Monometallic iron and bimetallic iron-cobalt particles on alumina. Chem Mater 1990;2:186-91.

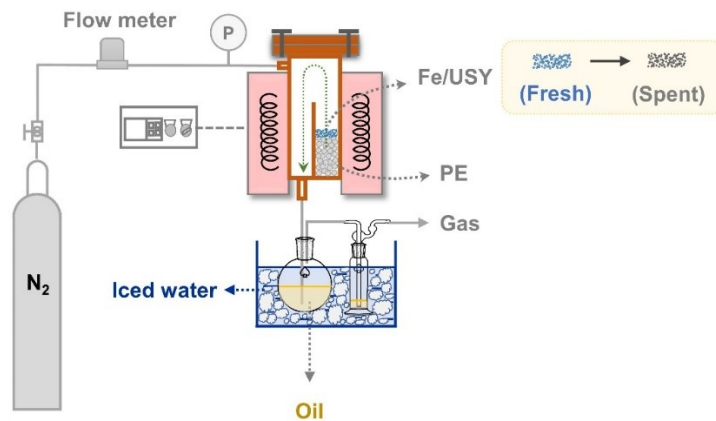

Fig. S2. Schematic diagram of the catalytic pyrolysis system.

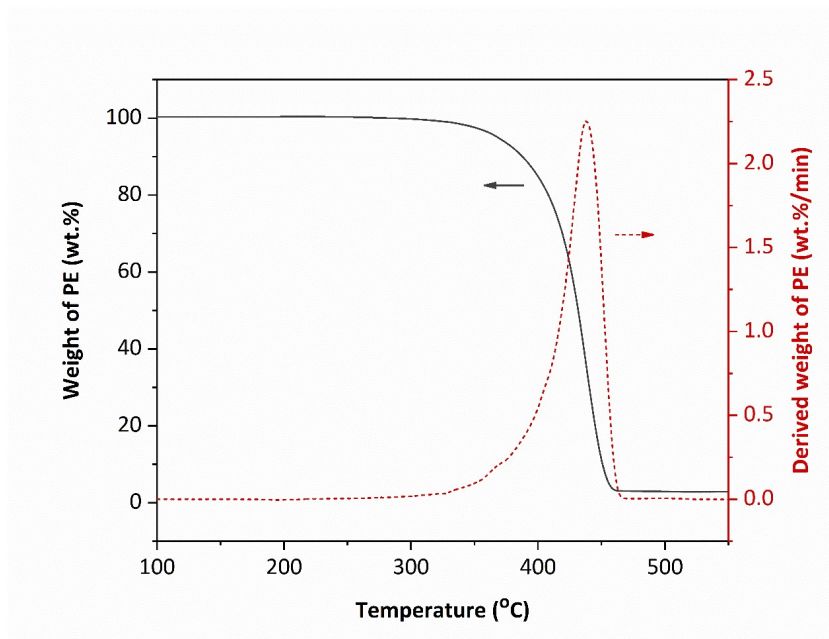

Fig. S3. TG profile of PE decomposition from 100 to 550°C under N<sub>2</sub> atmosphere.
